# Supplementary material for: Diagnostic Performance of a Smart Device With Photoplethysmography Technology for Atrial Fibrillation Detection: Pilot Study (Pre-mAFA II Registry)
Source: PubMed Central journal article supplement (PMC6423467; doi:10.2196/11437), 2019-03-05
Supplement: mhealth_v7i3e11437_app1.pdf [file mhealth_v7i3e11437_app1.pdf]

**Table 1 Baseline characteristics of participants**

| <b>Characteristics</b>                                        | <b>Sinus rhythm<br/>(n=56)</b> | <b>Persistent AF<br/>(n=52)</b> | <b>P value</b>     |
|---------------------------------------------------------------|--------------------------------|---------------------------------|--------------------|
| <b>Demographics</b>                                           |                                |                                 |                    |
| Age, mean $\pm$ SD                                            | 58 $\pm$ 14.78                 | 66.56 $\pm$ 13.17               | .002 <sup>a</sup>  |
| Female, n (%)                                                 | 26 (46)                        | 19 (37)                         | .298               |
| Body Mass Index,<br>kg/m <sup>2</sup> , mean $\pm$ SD         | 24.44 $\pm$ 2.875              | 25.98 $\pm$ 3.974               | .024 <sup>a</sup>  |
| <b>Medical history</b>                                        |                                |                                 |                    |
| Heart failure, n (%)                                          | 2 (4)                          | 12 (23)                         | .006 <sup>a</sup>  |
| Hypertension, n (%)                                           | 29 (52)                        | 35 (67)                         | .101               |
| DM, n (%)                                                     | 15 (27)                        | 17 (33)                         | .502               |
| Previous stroke/SE/<br>TIA, n (%)                             | 4 (7)                          | 9 (17)                          | .185               |
| CAD, n (%)                                                    | 25 (45)                        | 19 (37)                         | .392               |
| Vascular disease, n (%)                                       | 31 (55)                        | 37 (71)                         | .089               |
| COPD, n (%)                                                   | 1 (2)                          | 3 (6)                           | .558               |
| Renal dysfunction, n<br>(%)                                   | 2(4)                           | 8 (15)                          | .074               |
| Hepatic dysfunction, n<br>(%)                                 | 0                              | 2 (4)                           | .229               |
| Sleep apnea, n (%)                                            | 2 (4)                          | 6 (12)                          | .226               |
| Hyperthyroidism, n<br>(%)                                     | 1 (2)                          | 4 (8)                           | .317               |
| Current smoking, n (%)                                        | 16 (29)                        | 17 (33)                         | .642               |
| Current drinking, n (%)                                       | 13 (21)                        | 11 (23)                         | .797               |
| CHA <sub>2</sub> DS <sub>2</sub> -VASc score,<br>median [IQR] | 2[1-3.75]                      | 3[2-5]                          | .003 <sup>a</sup>  |
| HAS-BLED score,<br>median [IQR]                               | 1[0-2]                         | 2[1-2]                          | .005 <sup>a</sup>  |
| <b>Medications, n (%)</b>                                     |                                |                                 |                    |
| OAC                                                           | 10 (18)                        | 40 (77)                         | <.001 <sup>a</sup> |
| Anti-platelet drug                                            | 15 (27)                        | 23 (44)                         | .058               |
| CCB                                                           | 17 (30)                        | 13 (25)                         | .535               |
| ACEI/ARB                                                      | 21 (38)                        | 16 (31)                         | .461               |
| Diuretic                                                      | 5 (9)                          | 13 (25)                         | .025 <sup>a</sup>  |
| Digoxin                                                       | 3 (5)                          | 11 (21)                         | .015 <sup>a</sup>  |
| Anti-arrhythmic drug                                          |                                |                                 |                    |
| Class I                                                       | 6 (11)                         | 2 (4)                           | .320               |

|              |         |         |                    |
|--------------|---------|---------|--------------------|
| Beta-blocker | 27 (48) | 34 (65) | .072               |
| Class III    | 3 (5)   | 20 (38) | <.001 <sup>a</sup> |
| Class IV     | 3 (5)   | 3 (6)   | 1.00               |

<sup>a</sup> A *P* value less than .05 is considered as statistically significant.

AF=atrial fibrillation; SD=standard deviation; DM=diabetes mellitus; SE=systemic arterial embolism; TIA=transient ischemic attack; CAD=coronary artery disease; COPD=chronic obstructive pulmonary disease; CHA<sub>2</sub>DS<sub>2</sub>-VASc=congestive heart failure, hypertension, age≥75years, stroke (doubled), vascular disease, age 65-74, female sex; HAS-BLED=hypertension, abnormal renal function, abnormal liver function, stroke, bleeding, labile INR, age>65years, drugs or alcohol; OAC=oral anticoagulant; CCB=calcium channel blockers; ACEI/ARB=angiotensin-converting-enzyme inhibitor, angiotensin receptor blockers.
