# Supplementary material for: Diagnostic Performance of a Smart Device With Photoplethysmography Technology for Atrial Fibrillation Detection: Pilot Study (Pre-mAFA II Registry)
Source: PubMed Central journal article supplement (PMC6423467; doi:10.2196/11437), 2019-03-05
Supplement: mhealth_v7i3e11437_app2.pdf [file mhealth_v7i3e11437_app2.pdf]

**Table 2 Detailed diagnostic performance of the PPG technology for AF screening in different smart devices**

| Index                | Smart bands         | Smartphones         | Smartphone 1        | Smartphone 2        |
|----------------------|---------------------|---------------------|---------------------|---------------------|
| Sensitivity, %       | 95.36               | 94.96               | 94.41               | 95.56               |
| (95% CI)             | (92.00-97.40)       | (91.51-97.11)       | (88.91-97.38)       | (90.16-98.18)       |
| Specificity, %       | 99.70               | 99.70               | 100                 | 99.40               |
| (95% CI)             | (98.08-99.98)       | (98.07-99.98)       | (97.20-100)         | (96.18-99.97)       |
| PPV, % (95% CI)      | 99.63 (97.61-99.98) | 99.62 (97.59-99.98) | 100 (96.55-100)     | 99.23 (95.16-99.96) |
| NPV, % (95% CI)      | 96.24 (93.50-97.90) | 95.95 (93.15-97.68) | 95.43 (90.88-97.86) | 96.49 (92.17-98.57) |
| Accuracy, % (95% CI) | 97.72 (96.11-98.70) | 97.55 (95.89-98.57) | 97.42 (94.78-98.80) | 97.67 (95.05-98.97) |

AF=atrial fibrillation; PPG=photoplethysmography; CI=confidence interval; PPV=positive predictive value; NPV=negative predictive value.
