# Supplementary material for: Diagnostic Performance of a Smart Device With Photoplethysmography Technology for Atrial Fibrillation Detection: Pilot Study (Pre-mAFA II Registry)
Source: PubMed Central journal article supplement (PMC6423467; doi:10.2196/11437), 2019-03-05
Supplement: mhealth_v7i3e11437_app3.pdf [file mhealth_v7i3e11437_app3.pdf]

**Table 3 Data from the literature on atrial fibrillation detection with different technologies.**

| Study and year        | Population studied                                    | AF detection protocol                              | Sensitivity (%) | Specificity (%) | PPV (%) | NPV (%) |
|-----------------------|-------------------------------------------------------|----------------------------------------------------|-----------------|-----------------|---------|---------|
| McManus et al, 2013   | 76 patients before and after cardioversion            | An iPhone 4S, an algorithm combining RMSSD and ShE | 96.2            | 97.5            | -       | -       |
| Chan et al, 2016      | 1013 patients                                         | Cardio Rhythm smartphone application               | 92.9            | 97.7            | 53.1    | 99.8    |
| Krivoshei et al, 2017 | 1013 patients                                         | AliveCor automated algorithm                       | 71.4            | 99.4            | 76.9    | 99.2    |
|                       | 80 consecutive patients                               | An iPhone 4S, an algorithm combining RMSSD and ShE | 80              | 95              | -       | -       |
|                       | 80 consecutive patients                               | An iPhone 4S, an algorithm combining RMSSD and PPA | 95              | 95              | -       | -       |
|                       | 80 consecutive patients                               | An iPhone 4S, an algorithm combining ShE and PPA   | 50              | 95              | -       | -       |
| Rozen et al, 2018     | 97 patients before and after electrical cardioversion | An iPhone, Cardio Rhythm Mobile Application        | 93.1            | 90.9            | 92.2    | 92      |

|                       |                                                    |                                                                                         |      |      |      |      |
|-----------------------|----------------------------------------------------|-----------------------------------------------------------------------------------------|------|------|------|------|
| Bumgarner et al, 2018 | 100 patients before and after cardioversion        | Kardia Band from AliveCor paired with an apple smartwatch, AliveCor automated algorithm | 93   | 84   | -    | -    |
| Tison et al, 2018     | 51 sedentary participants undergoing cardioversion | smartwatch PPG coupled with a deep neural network                                       | 98   | 90.2 | 90.9 | 97.8 |
|                       | 1617 ambulatory participants                       | smartwatch PPG coupled with a deep neural network                                       | 67.7 | 67.6 | 7.9  | 98.1 |

---

AF=atrial fibrillation; PPV=positive predictive value; NPV=negative predictive value; RMSSD=root mean square of successive difference of RR intervals; ShE=Shannon entropy; PPA=Poincaré plot analysis; PPG=photoplethysmography.
